# Supplementary material for: Association between Motor Signs and Cognitive Performance in Cognitively Unimpaired Older Adults: A Cross-Sectional Study Using the NACC Database
Source: MDPI journal article supplement (doi:10.3390/brainsci12101365), 2022-10-08
Supplement: s1 [file s1]

| <b>Table S1.</b> Number of the subjects per 9 created motor signs and cognitive domains |                 |          |           |                 |                  |                    |
|-----------------------------------------------------------------------------------------|-----------------|----------|-----------|-----------------|------------------|--------------------|
|                                                                                         | Episodic memory | Language | Attention | Semantic memory | Processing speed | Executive function |
| Hypophonia                                                                              |                 |          |           |                 |                  |                    |
| Yes                                                                                     | 28              | 28       | 31        | 29              | 30               | 30                 |
| No                                                                                      | 7913            | 7933     | 7932      | 7925            | 7890             | 7806               |
| Masked Faces                                                                            |                 |          |           |                 |                  |                    |
| Yes                                                                                     | 57              | 56       | 59        | 58              | 57               | 56                 |
| No                                                                                      | 7885            | 7906     | 7905      | 7897            | 7864             | 7781               |
| Resting tremor                                                                          |                 |          |           |                 |                  |                    |
| Yes                                                                                     | 105             | 106      | 106       | 105             | 105              | 102                |
| No                                                                                      | 7835            | 7854     | 7857      | 7849            | 7815             | 7734               |
| Action/Postural Tremor                                                                  |                 |          |           |                 |                  |                    |
| Yes                                                                                     | 139             | 139      | 140       | 140             | 136              | 135                |
| No                                                                                      | 7801            | 7821     | 7823      | 7814            | 7784             | 7701               |
| Rigidity                                                                                |                 |          |           |                 |                  |                    |
| Yes                                                                                     | 165             | 166      | 168       | 164             | 162              | 158                |
| No                                                                                      | 7768            | 7787     | 7788      | 7783            | 7751             | 7672               |
| Bradykinesia                                                                            |                 |          |           |                 |                  |                    |
| Yes                                                                                     | 315             | 316      | 320       | 313             | 306              | 295                |
| No                                                                                      | 7579            | 7596     | 7595      | 7594            | 7570             | 7497               |
| Impaired Chair Rise                                                                     |                 |          |           |                 |                  |                    |
| Yes                                                                                     | 271             | 252      | 252       | 249             | 244              | 232                |
| No                                                                                      | 7659            | 7676     | 7679      | 7674            | 7647             | 7576               |
| Impaired Posture/Gait                                                                   |                 |          |           |                 |                  |                    |
| Yes                                                                                     | 216             | 215      | 213       | 213             | 205              | 198                |
| No                                                                                      | 7692            | 7711     | 7714      | 7707            | 7682             | 7606               |
| Postural Instability                                                                    |                 |          |           |                 |                  |                    |
| Yes                                                                                     | 179             | 180      | 181       | 176             | 172              | 166                |
| No                                                                                      | 7688            | 7705     | 7705      | 7705            | 7678             | 7601               |

**Table S2.** The number of the subjects per 9 created motor signs and cognitive domains, after excluding subjects with cerebrovascular disease or Parkinson's disease or other parkinsonian disorder

|                        | Episodic memory | Language | Attention | Semantic memory | Processing speed | Executive function |
|------------------------|-----------------|----------|-----------|-----------------|------------------|--------------------|
| Hypophonia             |                 |          |           |                 |                  |                    |
| Yes                    | NT              | NT       | NT        | NT              | NT               | NT                 |
| No                     | NT              | NT       | NT        | NT              | NT               | NT                 |
| Masked Faces           |                 |          |           |                 |                  |                    |
| Yes                    | NT              | NT       | NT        | NT              | NT               | NT                 |
| No                     | NT              | NT       | NT        | NT              | NT               | NT                 |
| Resting tremor         |                 |          |           |                 |                  |                    |
| Yes                    | NT              | NT       | NT        | NT              | NT               | NT                 |
| No                     | NT              | NT       | NT        | NT              | NT               | NT                 |
| Action/Postural Tremor |                 |          |           |                 |                  |                    |
| Yes                    | NT              | NT       | NT        | NT              | NT               | NT                 |
| No                     | NT              | NT       | NT        | NT              | NT               | NT                 |
| Rigidity               |                 |          |           |                 |                  |                    |
| Yes                    | NT              | NT       | NT        | NT              | NT               | NT                 |
| No                     | NT              | NT       | NT        | NT              | NT               | NT                 |
| Bradykinesia           |                 |          |           |                 |                  |                    |
| Yes                    | NT              | 203      | NT        | NT              | 198              | 190                |
| No                     | NT              | 7035     | NT        | NT              | 7013             | 6948               |
| Impaired Chair Rise    |                 |          |           |                 |                  |                    |
| Yes                    | 201             | NT       | NT        | 200             | 196              | 187                |
| No                     | 7028            | NT       | NT        | 7045            | 7024             | 6962               |
| Impaired Posture/Gait  |                 |          |           |                 |                  |                    |
| Yes                    | NT              | NT       | NT        | NT              | 156              | NT                 |
| No                     | NT              | NT       | NT        | NT              | 7064             | NT                 |
| Postural Instability   |                 |          |           |                 |                  |                    |
| Yes                    | NT              | NT       | NT        | NT              | NT               | NT                 |
| No                     | NT              | NT       | NT        | NT              | NT               | NT                 |

NT, non-tested in regression models

| <b>Table S3.</b> Sensitivity analysis with linear regression, for association between motor signs (that significantly associated in the main analyses) and performance in cognitive domains, after excluding subjects with cerebrovascular disease or Parkinson's disease or other parkinsonian disorder                            |        |        |        |                     |
|-------------------------------------------------------------------------------------------------------------------------------------------------------------------------------------------------------------------------------------------------------------------------------------------------------------------------------------|--------|--------|--------|---------------------|
|                                                                                                                                                                                                                                                                                                                                     | B      | 95% CI |        | P-value             |
|                                                                                                                                                                                                                                                                                                                                     |        | LL     | UL     |                     |
| <b>Episodic memory</b>                                                                                                                                                                                                                                                                                                              |        |        |        |                     |
| Impaired Chair Rise                                                                                                                                                                                                                                                                                                                 | -2.204 | -3.373 | -1.036 | <b>0.000219</b>     |
| <b>Language</b>                                                                                                                                                                                                                                                                                                                     |        |        |        |                     |
| Bradykinesia                                                                                                                                                                                                                                                                                                                        | -2.108 | -3.322 | -0.894 | 0.001               |
| <b>Semantic memory</b>                                                                                                                                                                                                                                                                                                              |        |        |        |                     |
| Impaired Chair Rise                                                                                                                                                                                                                                                                                                                 | -0.93  | -1.443 | -0.418 | <b>0.000373</b>     |
| <b>Processing speed</b>                                                                                                                                                                                                                                                                                                             |        |        |        |                     |
| Bradykinesia                                                                                                                                                                                                                                                                                                                        | 5.197  | 2.847  | 7.548  | <b>0.000015</b>     |
| Impaired Chair Rise                                                                                                                                                                                                                                                                                                                 | 6.194  | 3.787  | 8.601  | <b>&lt;0.000001</b> |
| <b>Executive function</b>                                                                                                                                                                                                                                                                                                           |        |        |        |                     |
| Bradykinesia                                                                                                                                                                                                                                                                                                                        | 13.582 | 6.27   | 20.895 | <b>0.000273</b>     |
| Impaired Chair Rise                                                                                                                                                                                                                                                                                                                 | 20.384 | 12.844 | 27.924 | <b>&lt;0.000001</b> |
| B, unstandardized correlation coefficient; CI, confidence interval; LL, lower limit; UL, upper limit<br>Adjusted analysis for age, years of education, sex, race, cardiovascular disease, traumatic brain injury, history of seizures, use of antidepressants and motor signs<br>Statistically significant values are given in bold |        |        |        |                     |
