# Supplementary figures and images for: Association between Motor Signs and Cognitive Performance in Cognitively Unimpaired Older Adults: A Cross-Sectional Study Using the NACC Database
Source: MDPI journal article supplement (doi:10.3390/brainsci12101365), 2022-10-08

**Figure S1** Flowchart of participant selection

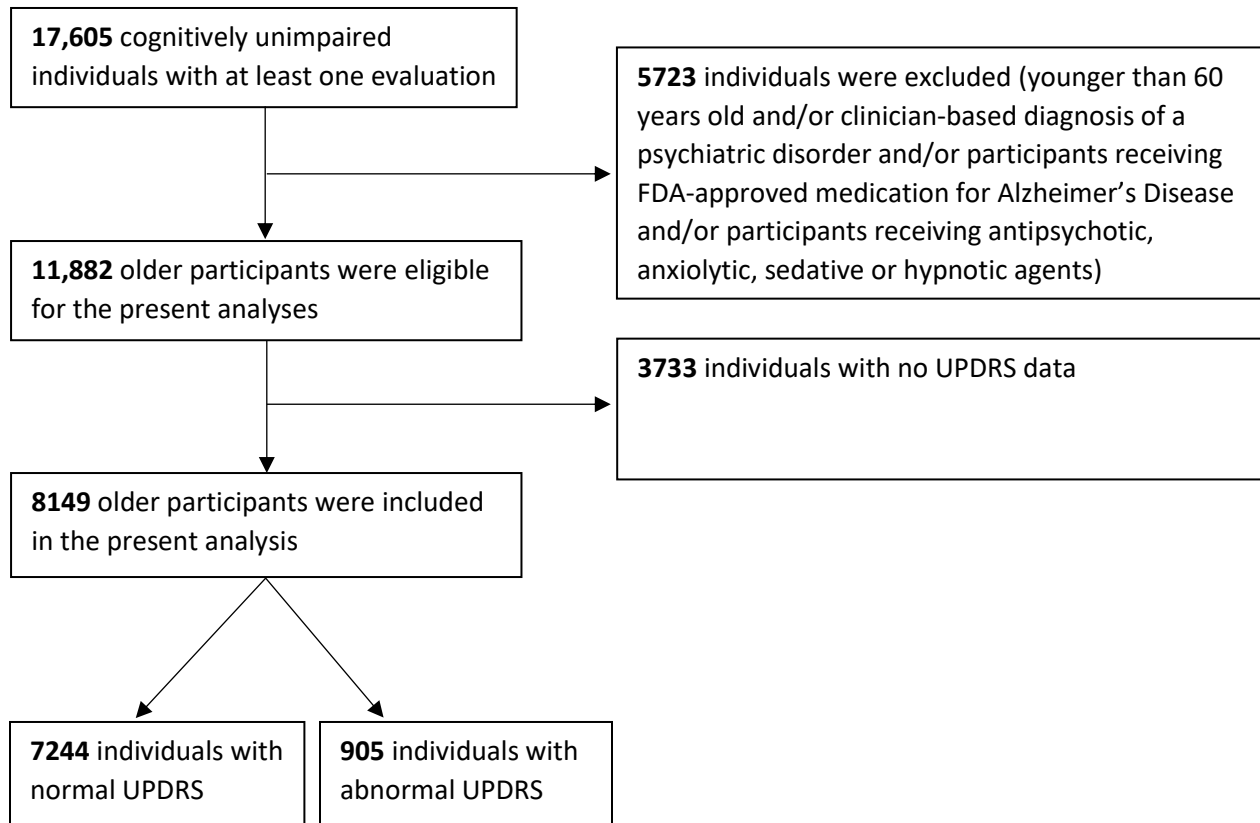

Supplement: s1 [file s1]
